# Supplementary figures and images for: Cysteine persulfides and polysulfides produced by exchange reactions with H2S protect SH-SY5Y cells from methylglyoxal-induced toxicity through Nrf2 activation
Source: PubMed Central journal article supplement — Redox Biol. 2017 Mar 24;12:530–9. doi: 10.1016/j.redox.2017.03.020 (PMC5377440; doi:10.1016/j.redox.2017.03.020), 2017-03-24

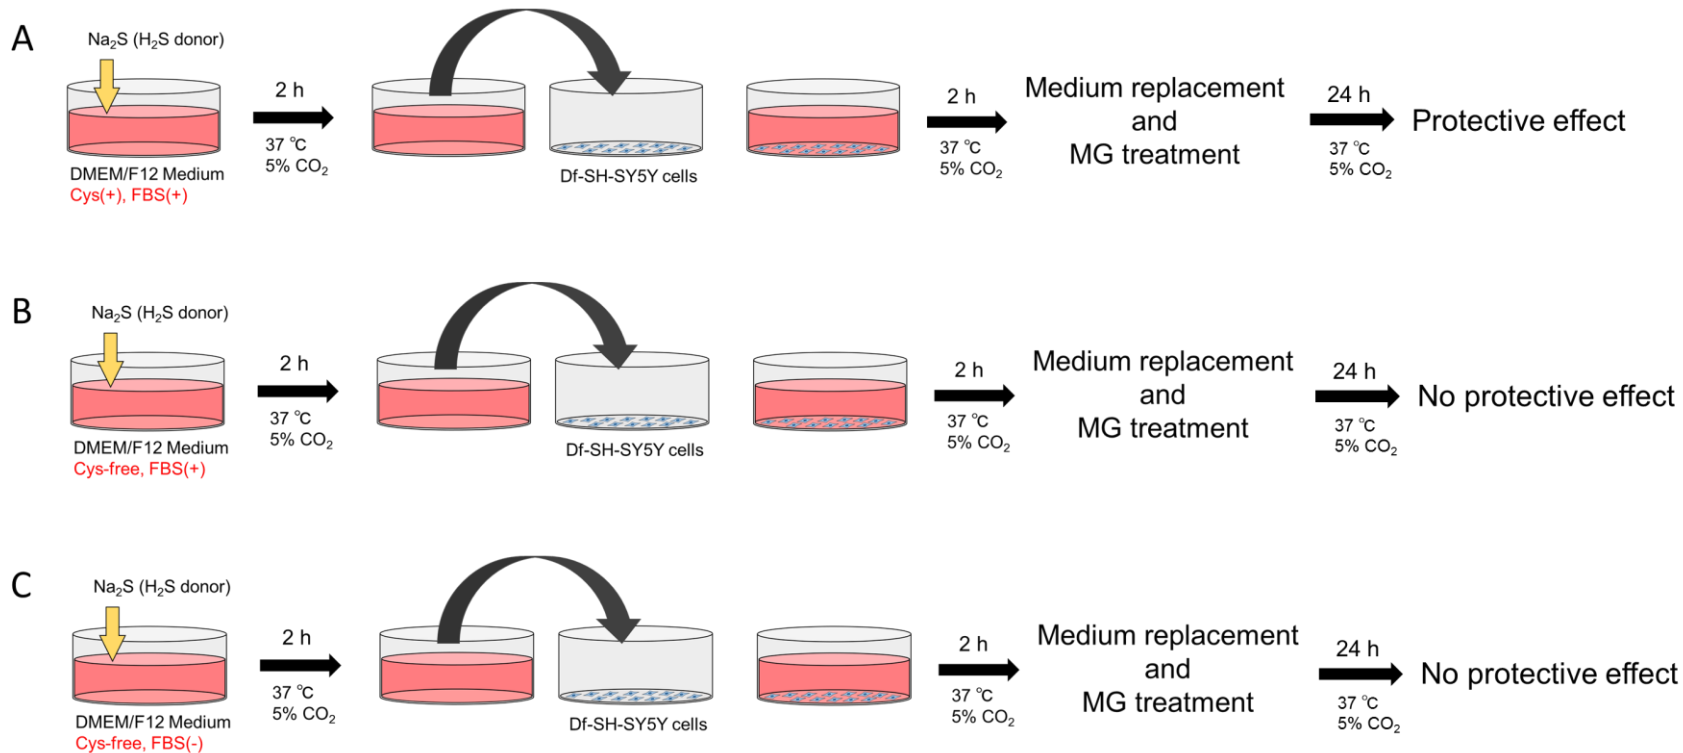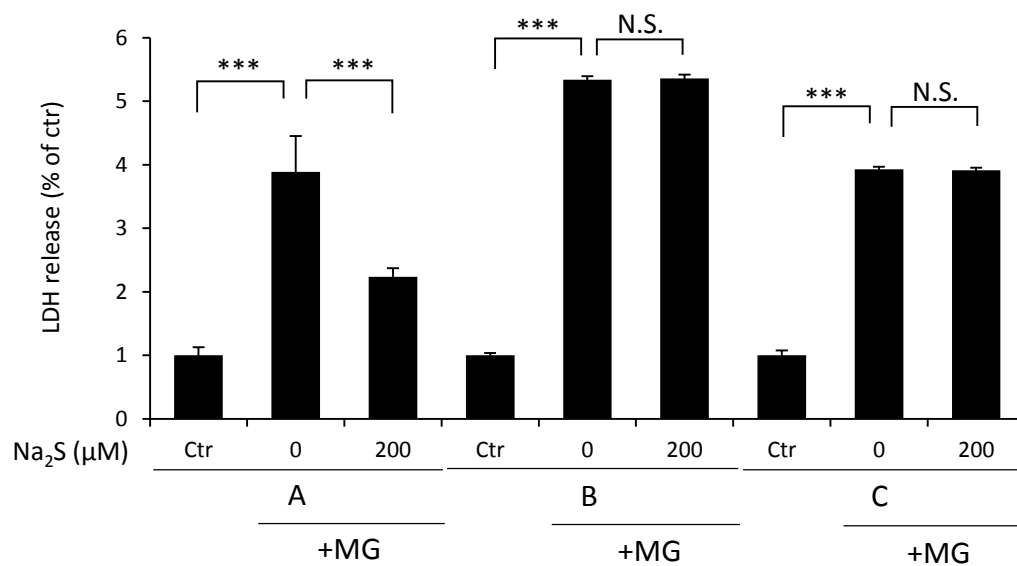

Supplement: mmc1.pdf [file mmc1.pdf]
